# Supplementary material for: Quality and correlates of medical record documentation in the ambulatory care setting
Source: Springer Nature journal article supplement (doi:10.1186/1472-6963-2-22), 2002-12-10
Supplement: Additional file 1 [file 1472-6963-2-22-s1.doc]

**Table 3. Multivariate Odds Ratios and 95% Confidence Intervals for Physician and Patient Characteristics for Documenting in the Medical Record.**

|  | |  | **Smoking History** | **Drug Allergies** | **Medications** | **Screening Guidelines** | Immunizations* |
| --- | --- | --- | --- | --- | --- | --- | --- |
|  | |  | OR (95% CI) | OR (95% CI) | OR (95% CI) | OR (95% CI) | OR (95% CI) |
| Internists | |  |  |  |  |  |  |
|  | *Characteristic* | |  |  |  |  |  |
|  | Female physician gender | | 1.90 (1.27-2.83) | 0.51 (0.35-0.75) | 1.16 (0.62-2.18) | 1.24 (0.82-1.89) | 2.04 (0.75-5.53) |
|  | Years since medical school | | 0.98 (0.95-1.00) | 0.97 (0.95-0.99) | 1.02 (0.98-1.06) | 0.98 (0.96-1.00) | 0.91 (0.87-0.96) |
|  | Clinical hours per week | | 1.02 (1.01-1.03) | 1.00 (0.99-1.01) | 1.00 (0.98-1.02) | 0.98 (0.97-1.00) | 1.01 (0.98-1.04) |
|  | Teaching | | 1.24 (0.64-2.39) | 1.38 (0.74-2.57) | 0.82 (0.29-2.36) | 1.35 (0.69-2.64) | 1.77 (0.41-7.73) |
|  | Site of Practice outside Boston City Limits | | 1.55 (1.08-2.20) | 0.88 (0.63-1.23) | 0.47 (0.26-0.85) | 0.98 (0.68-1.41) | 0.19 (0.07-0.47) |
|  | Female patient gender | | 0.51 (0.34-0.79) | 2.48 (1.65-3.74) | 1.49 (1.18-1.87) | 1.36 (1.06-1.73) | 0.61 (0.47-0.79) |
|  | Patient age | | 0.98 (0.96-0.99) | 0.99 (0.98-1.00) | 0.99 (0.98-1.00) | 0.99 (0.98-1.00) | 1.02 (1.01-1.03) |
|  | |  | **Smoking History** | **Drug Allergies** | **Medications** | **Screening Guidelines** |  |
|  | |  | OR (95% CI) | OR (95% CI) | OR (95% CI) | OR (95% CI) |  |
| Pediatricians | |  |  |  |  |  |  |
|  | *Characteristic* | |  |  |  |  |  |
|  | Female physician gender | | 2.78 (0.85-9.11) | 0.47 (0.28-0.79) | 0.78 (0.21-1.08) | 0.60 (0.14-2.64) |  |
|  | Years since medical school | | 0.98 (0.92-1.03) | 0.98 (0.95-1.01) | 0.94 (0.87-1.01) | 1.01 (0.93-1.10) |  |
|  | Clinical hours per week | | 1.01 (0.96-1.07) | 0.98 (0.96-1.01) | 1.03 (0.96-1.10) | 1.22 (1.06-1.41) |  |
|  | Teaching | | 2.25 (0.28-17.79) | 1.68 (0.59-4.79) | 2.19 (0.14-35.29) | 2.54 (0.14-47.20) |  |
|  | Site of Practice outside Boston City Limits | | 1.96 (0.58-6.62) | 3.17 (1.05-9.57) | 7.93 (1.87-33.68) | 0.08 (0.01-0.58) |  |
|  | Female patient gender | | 0.37 (0.11-1.23) | 1.62 (1.19-2.20) | 1.37 (0.99-1.92) | 0.17 (0.08-0.38) |  |
|  | Patient age | | 1.61 (1.12-2.31) | 1.04 (1.00-1.07) | 0.97 (0.91-1.04) | 0.93 (0.88-0.99) |  |

* Odds ratios for the immunizations outcome measure were not calculable for pediatricians because pediatricians documented immunizations for 100% of records reviewed.

OR = odds ratio, CI = confidence interval
